# Supplementary material
Source: Springer Nature journal article supplement (https://www.springermedizin.de/resource/supplementary/12891_2006_340_MOESM4_ESM.pdf/9511094)

# Figure IV

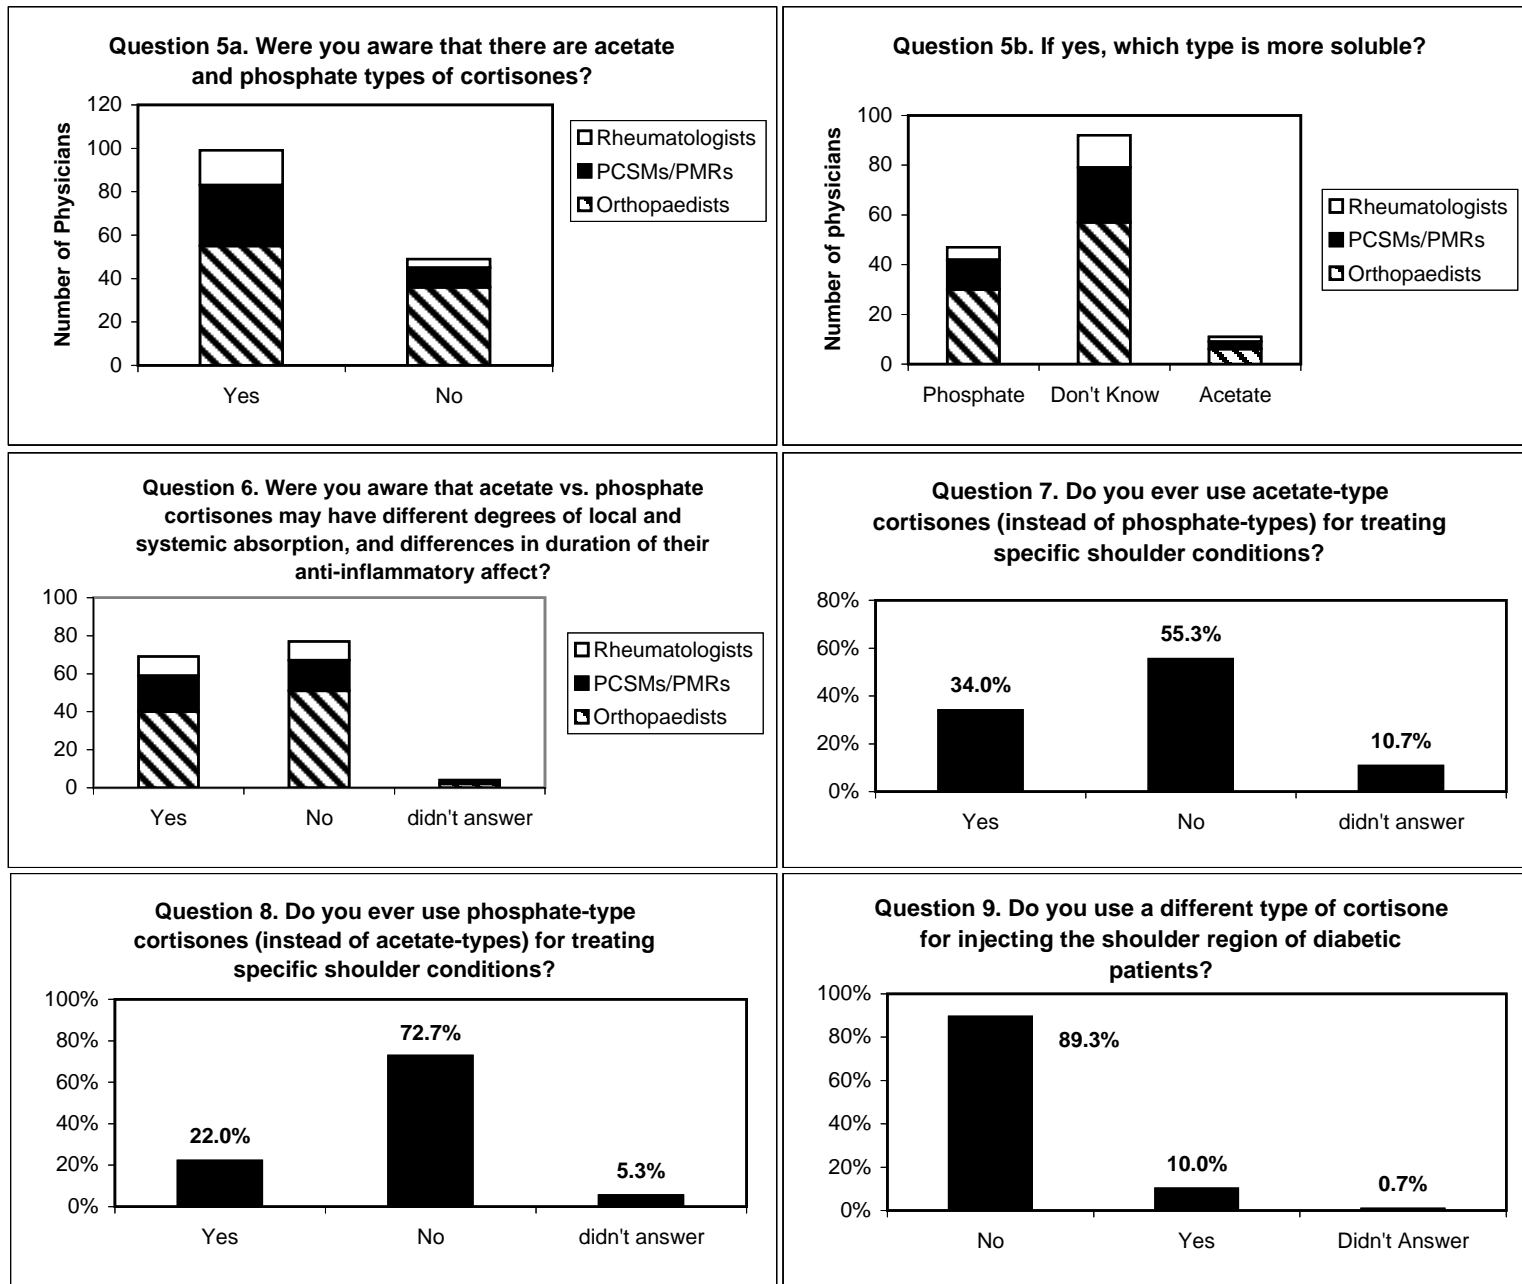

Supplement: MOESM4 [file 9511094]
